# 1 Parkinson Disease

## 2 Flanker task-elicited Event Related Potential sources reflect human recombinant 3 Erythropoietin differential effects on Parkinson's patients

4 Maria L Bringas Vega<sup>1,2\*</sup>, Shengnan Liu<sup>1</sup>, Min Zhang<sup>1</sup>, Ivonne Pedroso Ibañez<sup>2</sup>, Lilia M.  
5 Morales Chacon<sup>2</sup>, Lidice Galan Garcia<sup>3</sup> Vanessa Perez Bocourt<sup>4</sup>, Marjan Jahanshahi<sup>1,5</sup>, Pedro  
6 A Valdes-Sosa<sup>1,3\*</sup>

- 7 1. The Clinical Hospital of Chengdu Brain Science Institute, MOE Key Lab for Neuroinformatics,  
8 University of Electronic Science and Technology of China, Chengdu, China;  
9 2. Centro Internacional de Restauracion Neurologica CIREN, La Habana, Cuba;  
10 3. Centro de Neurociencias de Cuba CNEURO La Habana Cuba  
11 4. Miami Dade College, Florida USA  
12 5. UCL Queen Square Institute of Neurology, London UK;

13 \*These authors contributed equally to the paper.

14 Correspondence ML Bringas Vega and Pedro Valdes-Sosa [maria.bringas@neuroinformatics-](mailto:maria.bringas@neuroinformatics-collaboratory.org)  
15 [collaboratory.org](mailto:pedro.valdes@neuroinformatics-collaboratory.org) [pedro.valdes@neuroinformatics-collaboratory.org](mailto:pedro.valdes@neuroinformatics-collaboratory.org)

## 16 Abstract

17 We used EEG source analysis to identify which cortical areas were involved in the automatic  
18 and controlled processes of inhibitory control on a flanker task and compared the potential  
19 efficacy of recombinant-human erythropoietin (rHuEPO) on the performance of Parkinson's  
20 Disease patients.

21 The samples were 18 medicated PD patients (nine of them received rHuEPO in addition to  
22 their usual anti-PD medication through random allocation and the other nine patients were  
23 on their regular anti-PD medication only) and 9 age and education-matched healthy controls  
24 (HCs) who completed the flanker task with simultaneous EEG recordings. N1 and N2 event-  
25 related potential (ERP) components were identified and a low-resolution tomography  
26 (LORETA) inverse solution was employed to localize the neural generators.

27 Reaction times and errors were increased for the incongruent flankers for PD patients  
28 compared to controls. EEG source analysis identified an effect of rHuEPO on the lingual gyri  
29 for the early N1 component. N2-related sources in middle cingulate and precuneus were  
30 associated with the inhibition of automatic responses evoked by incongruent stimuli  
31 differentiated PD and HCs.

32 From our results rHuEPO, seems to mediate an effect on N1 sources in lingual gyri but not on  
33 behavioural performance. N2-related sources in middle cingulate and precuneus evoked by  
34 incongruent stimuli differentiated PD and HCs.

## 35 Introduction

36 Discovering neuroprotective agents to slow down the progression of Parkinson's Disease (PD)  
37 and, importantly, to improve cognitive deficits is an active area of research (Athauda &  
38 Foltynie, 2015). The search for agents to supplement usual dopaminergic treatments directed  
39 towards motor symptoms is not surprising since the characteristic motor impairment of  
40 patients is usually accompanied by cognitive deficits (Kehagia, Barker, & Robbins, 2010). Since  
41 cognitive dysfunction has a negative impact on the quality of life of patients (Schrag,  
42 Jahanshahi, & Quinn, 2000); finding effective therapies that target cognition in PD is of  
43 paramount importance. As an example, we found that human recombinant erythropoietin  
44 (rHuEPO) (Pedroso et al., 2012) improved general measures of cognition in chronically  
45 medicated PD patients, an additional benefit to that obtained on their usual medical  
46 treatment. This result extends to PD the evidence for neuroprotective properties of rHuEPO  
47 already described in other neurologic diseases (Brines & Cerami, 2005) and is supported by  
48 the anti-apoptotic, anti-inflammatory and cytoprotective effects of EPO in PD animal models  
49 (Sirén, Faßhauer, Bartels, & Ehrenreich, 2009) (Xue, Zhao, & Guo, 2007). This promising result  
50 suggested the need to further study the effect of rHuEPO on cognition in PD.

51 We believe that to further understand the effect of rHuEPO on cognition in PD patients we  
52 need to examine its effect on specific stages of information processing. This is because the  
53 overt behavioural measures used in our previous study: a) do not have temporal sensitivity,  
54 being the end outcome of many sequential processes, and b) do not reflect localized neural  
55 activity. Consequently, and as a first objective, we zeroed in on very early automatic neural  
56 processes involved in inhibitory control, the lack of which is so common in non-demented PD  
57 patients. This early lack of inhibitory control is easily measured in a number of tasks such as  
58 the Stop signal, go no-go, Stroop, Hayling Sentence Completion task and the Simon task  
59 described in (Obeso et al., 2011) and (Seer, Lange, Georgiev, Jahanshahi, & Kopp, 2016).  
60 However, we decided to use a very well-studied paradigm: Eriksen's Flanker Task (Eriksen &  
61 Eriksen, 1974). It explores the lack of inhibition related to the difficulty in suppressing  
62 interference by incongruent stimuli. It allows the evaluation of very short latency automatic  
63 activation to incongruent flankers around 100 msec. and other, controlled processes, around  
64 200 msec. These produce increased reaction times (RTs) and errors in incongruent trials  
65 versus congruent trials in PD patients in comparison with normal (eg. (P Praamstra, Stegeman,  
66 Cools, & Horstink, 1998; Peter Praamstra, Plat, Meyer, & Horstink, 1999; S A Wylie et al., 2009;  
67 Scott A Wylie, Stout, & Bashore, 2005). It is, however, the early ERP responses that are of  
68 interest here, not the overt behavioural response indexed by the RT which occurs later about  
69 400 msec.

70 There is no clear way to study these early responses behaviourally. However, these  
71 processes might be probed by direct measurements of fast neural responses such as those  
72 provided by event-related responses (ERPs). In particular, the Flanker task elicits the N1, N2  
73 and P3 ERP components, which are related to automatic and controlled process respectively  
74 (Pires, Leitai, Guerrini, & Simoes, 2014). Here, we will focus only on the early components  
75 N1 and N2. The N1 component has not been, to our knowledge sufficiently studied in the  
76 Flanker task in PD. However, the fronto-central N2 on incongruent trials of flanker tasks in  
77 patients with PD have received more attention (M Falkenstein, Willemsen, Hohnsbein, &  
78 Hielscher, 2006; J. R. Folstein & Van Petten, 2008; Verleger et al., 2010; S A Wylie et al.,  
79 2009; Scott A Wylie et al., 2005). The comparison of medicated PD patients and drug-naïve

80 de novo PD patients showed that neither the presence of PD (see also (Verleger et al., 2010)  
81 nor dopaminergic medication modulates N2 amplitude variability on incongruent conditions  
82 of flanker tasks (for a discussion see a review of ERP and cognition in PD by Seer et al.,  
83 2017). It seems logical then to determine if the additional cognitive improvement produced  
84 by rHuEPO with respect to dopaminergic treatment, is accompanied by changes in the early  
85 components in the N1 and N2 ERP components, helping us to pinpoint one of the stages of  
86 cognitive processing affected by this drug. Furthermore, in addition to finer grained timing  
87 information, it is possible to leverage source localization methods to identify the neural  
88 sources of any ERP component change.

89 Therefore, the aim of our study is to use a flanker task to identify if rHuEPO improves  
90 automatic and controlled inhibitory control in PD patients and to locate the neural generators  
91 of these processes. This could be a first step in identifying an ERP biomarker for this type of  
92 cognitive process to be used in clinical trials.

## 93 **Materials and Methods**

### 94 **Methods:**

#### 95 **Description of the Sample and Clinical Trial**

96 Eighteen PD patients (Hoehn and Yahr stages I to III, mean age 53.9, SD 3.2 years) were  
97 recruited at the Clinic of Movement Disorders and Neurodegeneration, Centro Internacional  
98 de Restauracion Neurologica (CIREN) in La Habana, Cuba to participate in a safety clinical  
99 assay of Erythropoietin (rHuEPO) in PD. The design of this investigation, results, scheme of  
100 application and doses employed may be found in (Pedroso et al., 2012). Inclusion criteria were  
101 a clinical diagnosis of idiopathic PD according to the UK Brain Bank criteria and a good  
102 response to dopaminergic treatment and aged between 45-75 years (Hughes, Daniel, Kilford,  
103 & Lees, 1992). Exclusion criteria were manifestation or indicative signs of major cognitive  
104 impairment, psychotic symptoms, and/or presence of other chronic diseases. Nine of the PD  
105 patients, through random allocation, received additionally to their usual anti-parkinsonism  
106 medication, rHuEPO for five weeks and the other nine did not. rHuEPO approved and  
107 registered for use in humans was obtained at the Centro de Inmunologia Molecular, La  
108 Habana Cuba (ior<sup>®</sup> EPOCIM). There were no significant differences in age, years of education  
109 or duration of illness between the two PD groups. To exclude dementia and major depression,  
110 the Mini Mental State Examination and the Hamilton Depression Scale were respectively  
111 administered (M. F. Folstein, Folstein, & McHugh, 1975; Hamilton, 1960). All patients were  
112 assessed on the motor subscale of the Unified Parkinson's Disease Rating Scale (UPDRS) both  
113 during "on" (mean 6.3, SD1.1) and "off" medication (mean 21.7, SD 4.3) states.

114 For the purpose of comparisons, 9 healthy controls (HCs) matched in age (mean 51.2, SD 3.9  
115 years) and educational level were recruited at the same clinic. The PD patients were tested  
116 on their usual anti-parkinsonism medication. The patients and controls signed an informed  
117 consent to participate in this study as a complement of the clinical trial following the CIREN  
118 ethics committee regulations.

## 119 **Eriksen's Flanker Task**

120 All participants completed the Eriksen's Flanker task, while the EEG was simultaneously  
121 recorded. Each trial of the task consisted of the presentation of a set of 5 ordered letters  
122 (HHHHH or SSSSS) for the congruent condition and 5 letters with H or S at the centre and  
123 different laterals or flankers (SSHSS or HSHSH) for the incongruent condition. Participants  
124 were instructed to respond to the central letter, whether H or S, by pressing a key with the  
125 index finger of the right or left hand respectively. Participants were instructed to respond as  
126 fast and as accurately as possible. A total of 480 trials in two blocks, each lasting 8 minutes  
127 were completed. In each block 80 stimuli were shown for the congruent condition and 160  
128 for the incongruent. Only the correct responses with reaction times (RTs) >150 and <800  
129 msec. were selected for analysis.

130 The physical characteristics of the stimuli were black letters on a white frame with a height =  
131 1.5 cm. and Length= 7 cm., under 6° a visual angle. The distance of the participant to the  
132 computer monitor was 60 cm. Each stimulus was presented at the centre of the screen for  
133 190 msec., followed by a fixed interstimulus interval (ITI) of 1735 msec. A training block of 40  
134 stimuli was designed to ensure task instructions were understood.

## 135 **ERP measurement**

136 The Electroencephalogram (EEG) was continuously recorded at a sampling rate of 512 Hz from  
137 64 electrodes located at standard positions of the International 10/20 System using a Brain  
138 Vision system ([https://www.brainproducts.com/products\\_by\\_apps.php?aid=5](https://www.brainproducts.com/products_by_apps.php?aid=5)) (Jasper,  
139 1958). Linked ears were used as on-line reference and the front as earth. To monitor eye  
140 movement artefacts, the electro-oculogram (EOG, horizontal and vertical) was recorded from  
141 electrodes placed 1 cm to the left and right of the external canthi, and from an electrode  
142 beneath the right eye.

143 Data were filtered using 1-30 Hz and a notch filter to eliminate the 60Hz powerline artefact.  
144 All data were referenced using an average reference to all the channels. The baseline was  
145 corrected between -200 to -0 msec. Epochs with electric activity exceeding baseline activity  
146 by 100 µV were considered as artefacts and were automatically rejected from further  
147 processing (15% of epochs related to hits and 11% of the epochs related to errors). For the  
148 analysis, several electrodes were excluded (EOG, ECG, TP9 and TP10).

149 ERPs were obtained from the EEG recordings for each participant for all the electrodes  
150 within the two experimental conditions and averaged over the two groups using Analyzer  
151 software (<https://www.brainproducts.com/productdetails.php?id=17>). Epochs of 800 msec.  
152 (from -200 msec. (baseline) until 600 msec. post-stimulus onset) were analyzed locked to  
153 the stimulus. We selected two windows to examine the stimulus-locked ERPs, using only the  
154 correct response averages for the N1 (80-180 msec.) and N2 (200-300 msec.) components in  
155 the expected time-windows (see ERPs guidelines in (Picton et al., 2000). Henceforth we will  
156 refer to these averages simply as the amplitude of the N1 and N2 components. The average  
157 waveform for each participant and each condition was estimated in all the electrodes, but  
158 the averaged waveform for group are plotted below for the electrode with the higher  
159 statistics amplitudes.

160 In order to localize the generators of the ERP components, a lead field was constructed for  
161 each participant to calculate the (volume-constrained) inverse solution, at the two selected  
162 latencies using LORETA (Low Resolution Tomography) (<http://www.uzh.ch/keyinst/loreta>) .  
163 (Pascual-Marqui et al., 1999) For LORETA, the intracerebral volume is partitioned into 6239  
164 voxels at 5mm spatial resolution.

## 165 **Statistical analysis**

166 We now summarize the experimental design. Our sample is divided into 3 **Groups**: 9  
167 Parkinson patients with the usual treatment (PD Control), 9 patients with the usual treatment  
168 plus EPO (PD rHuEPO), and 9 healthy controls (HCs). Additionally, the ERPs for each  
169 participant was recorded in two conditions: congruent and incongruent.

170 For each participant the following variables were used in this paper:

- 171 1. Reaction Time and errors to the Flanker task
- 172 2. Amplitude of the N1 and N2 ERP component at the 60 EEG scalp electrodes.
- 173 3. Power of the N1 and N2 sources component for the 6239 source voxels.

174 The statistical analyses performed were:

- 175 a) Reaction Times and errors were analysed using a two-way repeated measure ANOVA  
176 with the with Group (HCs, PD Control and PD rHuEPO) as the between group factor  
177 and the experimental condition (incongruent versus congruent) as the within-subject  
178 repeated measures factor. We report the F statistic and the p value for tests of the  
179 main effect and the interaction. The Greenhouse-Geisser adjustment was applied  
180 since lack of sphericity was observed. These analyses were completed with STATISTICA  
181 7.0.
- 182 b) An exploratory analysis of the differences in ERP amplitude topographies between the  
183 HCs and PD Control +PD rHuEPO groups was carried out by means of a multivariate t  
184 test that corrects for multiple comparisons by means of a permutation technique. The  
185 permutation test has the following advantages: the tests are distribution free that  
186 control the experiment-wise error for the simultaneous univariate comparisons, no  
187 assumptions of an underlying correlation structure are required, and they provide  
188 exact p-values valid for any number of subjects, timepoints and all 60 electrodes. The  
189 overall significance level was selected to be 0.05. The method is described in (Galán,  
190 Biscay, Rodríguez, Pérez-Abalo, & Rodriguez, 1997; Galan, Biscay, Valdes, Neira, &  
191 Virues, 1994) as implemented in the software NEEST from Neuronic  
192 <http://www.neuronicsa.com/>. This allowed the selection of a:
  - 193 1- A subset of electrodes to be subjected to Multivariate Analysis of Variance  
194 (MANOVA) to be described in c) below.
  - 195 2- The selection of most representative electrodes to plot the N1 and N2 grand  
196 average ERPs.
  - 197 3- The analysis of time intervals to be further studied.
- 198 c) Examine for each ERP component, and for their selected group of electrodes, a  
199 repeated measures Multivariate Analysis of Variance (r-MANOVA) for the design  
200 Group by Condition with a significance level set at the 0.05 level. The different

201 contrasts for the interaction and main effects were tested by using the Wilk's lambda,  
 202 approximated by an F function and the p value reported. Note that this allows a  
 203 simultaneous confidence interval for contrasts on group differences and to examine  
 204 which electrode contribute to the effects. The MANOVA was that implemented in the  
 205 STATISTICA 7.0. package.

206 d) Further analysis for selected differences of the ERP component source images  
 207 between selected groups was carried out using the LORETA-built-in voxel-wise  
 208 randomization tests with 2000 permutations (Nichols & Holmes, 2001), based on  
 209 statistical nonparametric mapping. Voxels with significant differences ( $p < 0.01$ ,  
 210 corrected for multiple comparisons) between contrasted conditions were located with  
 211 the coordinates of the AAL (Automated Anatomical Labelling of Activations) 116  
 212 structures atlas of the Montreal Neurological Institute (MNI) (Tzourio-Mazoyer et al.,  
 213 2002).

## 214 Results

### 215 Behavioural results:

216 **Reaction time.** The differences between the three groups were significant for Factor Group:  
 217 ( $F(2,24)=7.47$ ,  $p=0.003$ ), the Condition was not significant as we predicted in the preliminary  
 218 analysis ( $F(2,24)=3.22$ ,  $p=0.06$ ). The interaction of Group\*Condition also was not significant  
 219 ( $p > 0.8$ ). The contrast between the two groups of patients (PD Control and PD rHuEPO) didn't  
 220 show differences in the reaction time ( $F(2,15)=0.62$ ,  $p=0.55$ ). Table 1 shows the performance  
 221 of the PD groups separately and Table 2 the fusion of PD patients versus HCs.

222 **Errors.** The differences between the errors in the three groups were significant for Factor  
 223 Group: ( $F(2,15)=10.49$ ,  $p=0.0014$ ), and for Condition, ( $F(2,24)=11.6$ ,  $p=0.0003$ ), but not for the  
 224 interaction Group\*Condition ( $p=0.1$ ). The comparison between the two PD groups were  
 225 significant only for Condition, incongruent ( $F(1,16)=55.3$ ,  $p=0.00001$ , and not for the  
 226 congruent condition ( $F(1,16)=1.88$ ,  $p=0.18$ ).

|                             | PD rHuEPO n=9  |                | PD Control n=9 |                |
|-----------------------------|----------------|----------------|----------------|----------------|
|                             | congruent      | incongruent    | congruent      | incongruent    |
|                             | Means (SD)     | Means (SD)     | Means (SD)     | Means (SD)     |
| <b>Reaction times msec.</b> | 459.33 (71.76) | 479.89 (49.43) | 460.22 (72.10) | 488.22 (63.76) |
| <b>Percent errors</b>       | 13.22 (7.76)   | 43.22 (21.37)  | 8.78 (6.76)    | 32.00 (15.79)  |

227 **Table 1: The results of the reaction times and the percent errors for the congruent and incongruent trials**  
 228 **for the PD patients with and without rHuEPO. The values in the table are means with standard deviations**  
 229 **in parenthesis.**

230 When using the contrast comparing all PD patients and HCs (Table 2), the results were  
 231 consistent with previous findings where the RTs increased with incongruent flankers  
 232 compared to congruent for both groups.

233

|                            | (PD rHuEPO + PD Control) n=18 |                | HCs n=9        |                |
|----------------------------|-------------------------------|----------------|----------------|----------------|
|                            | congruent                     | incongruent    | congruent      | incongruent    |
|                            | Means (SD)                    | Means (SD)     | Means (SD)     | Means (SD)     |
| <b>Reaction time msec.</b> | 459.78 (69.79)                | 484.06 (55.51) | 411.22 (52.00) | 431.33 (43.47) |
| <b>Percent errors</b>      | 9.00 (3.81)                   | 37.61 (19.12)  | 3.33 (2.40)    | 11.00 (7.42)   |

234 **Table 2: The results of the reaction times and percent errors for the congruent and incongruent trials for the**  
 235 **Parkinson's. disease (PD) patients and healthy control (HCs) groups. The values in the table are means with**  
 236 **standard deviations in parenthesis.**

### 237 Exploratory results of ERPs

238 As mentioned in the Methods, the multivariate t tests corrected for multiple comparisons  
 239 with permutation tests provides exact p-values, valid for any number of participants,  
 240 timepoints and recording sites yielded as significant the ERP components in the midline at the  
 241 0.05 level. Within this group the most significant ERP was Oz for N1 and Cz for N2 as described  
 242 in the literature. We will therefore concentrate on these electrode sets henceforth since they  
 243 all are significant above the globally valid significance threshold.

244 The same procedure allows, additionally, to select the time windows and which factor  
 245 (Condition or Group) to be further analyzed. Figure 1 illustrates, for one derivation, the  
 246 statistics shown above the red line, the latencies with significance for each factor (Group or  
 247 Condition) in all the time window for analysis. The interaction between them was not  
 248 significant at any time. The exploratory analysis between experimental conditions did not  
 249 reflect significant differences in the time range for the early ERP components N1 and N2  
 250 (around 100 and 200 msec. respectively).

251 Note that the significant differences for Condition are in the range of the P300 or later, not in  
 252 the scope of our study. For that reason, we focus all the further analysis on the incongruent  
 253 condition, which is the condition which elicits inhibitory control. Nevertheless, henceforth we  
 254 continue to report the full two-way analysis (Group x Condition), though concentrating on the  
 255 Group Factor analyses.

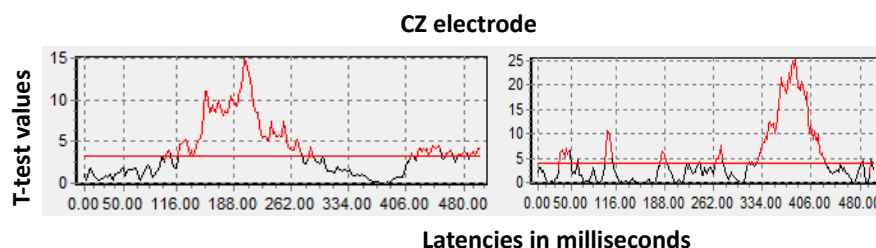

256  
 257 **Figure 1. Left: t values for the tests of differences between Groups independently of Condition. Right: the t**  
 258 **values tests for differences between Condition independently of Group. The read line indicates the statistical**  
 259 **significant threshold (corrected for all electrodes and all times by a multivariate permutation test).**

## 260 Analysis of the N1 component:

261 We tested the N1 amplitudes with the repeated measures rMANOVA (Group X Condition),  
262 and examined the main effects and the interaction between them. The interaction and the  
263 factor Condition were not significant ( $p=0.23$ ). However, the main effect of Group was  
264 significant with a Wilk's Lambda=0.40,  $F(8,42)=2.97$ ,  $p=0.009$ . A contrast between the two  
265 groups of patients was also significant with a Wilk's Lambda=0.47,  $F(4,13)=1.2$ ,  $p=0.003$ .  
266 Furthermore, with electrode-wise contrasts 13 electrode sites **F4, FC2, FC4, FC6, C2, C4, C6,**  
267 **CP2, O1, O2, Oz, PO3, PO4, PO7, PO8** retained significance. Note that the N1 at the O1  
268 electrode followed the following pattern (See Figure 2): the amplitude of the PD rHuEPO  
269 group ( $-4.2 \mu\text{V}$ ) was not different statistically from that of the HCs. On the other hand, the  
270 amplitude of the PD Control group ( $-1.2 \mu\text{V}$ ) was significantly lower.

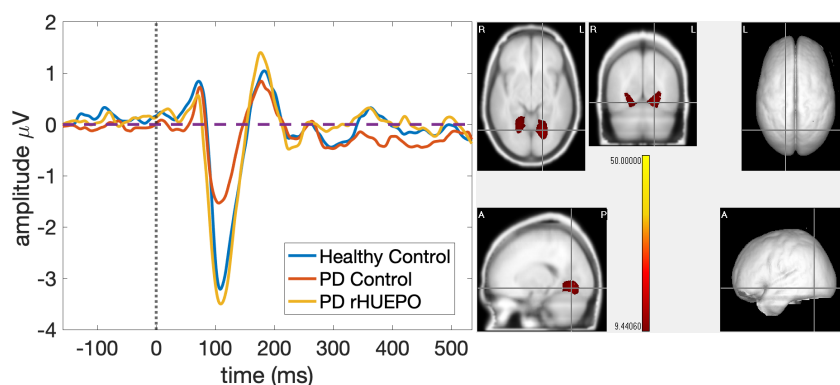

271  
272 **Figure 2: Left: the group average N1 waveform for each group in the window (80-180 msec.) in the electrode**  
273 **site O1 with the highest amplitude. The N1 peak was at 152 msec. Right: The Lingual Gyri are the sources of**  
274 **the N1 component according to AAL coordinates (X=92, Y=76, Z=172). The scale of statistical significance is**  
275 **self generated using the real values of the original data. All the voxels plotted were significant at  $p < 0.01$ .**

276 The localization of the differences between the two Parkinson groups of this component are  
277 localized anatomically by means of the randomized nonparametric test for LORETA. This  
278 showed that the PD rHuEPO had a larger N1 component than the PD Control group at the  $p <$   
279  $0.01$  level (corrected for multiple comparisons) at the lingual gyri (See right side of Figure 2).

## 280 Analysis of the N2 component:

281 We tested the N2 amplitudes with the repeated measures rMANOVA (Group X Condition),  
282 and examined the interaction and the main effects. The interaction was not significant with a  
283 Wilk's Lambda=0.43,  $F(6,44)=2.97$  and the factor Condition was also not significant ( $p=0.323$ ).

284 The main effect of Group (comparing **three groups**) was significant,  $F(2,24)=6.14$ ,  $p=0.006$ , in  
285 seven fronto-central electrodes: Cz ( $F(2,24)=6.50$ ,  $p=0.005$ ), CPz ( $F(2,24)=4.43$ ,  $p=0.02$ ), CP1  
286 ( $F(2,24)=5.9$ ,  $p=0.008$ ), CP2 ( $F(2,24)=5.6966$ ,  $p=0.00945$ ), C1 ( $F(2,24)=3.6125$ ,  $p=0.04251$ ), C2  
287 ( $F(2,24)=4.6242$ ,  $p=0.02$ ).

288 A contrast between the **two groups** of patients was also significant in fronto-central areas,  
289 the electrodes Cz ( $F(2,24)=4.43$ ,  $p=0.002$ ), CPz ( $F(2,24)=6.5$ ,  $p=0.005$ ) and FC1, FC2, C1, C2  
290 ( $p < 0.05$ ). There were no significant differences between conditions or interaction between  
291 factors.



292 Note that the N2 grand average at the Cz electrode followed an opposite pattern than N1  
 293 (See Figure 4): the amplitude of the PD Control group (-2.10  $\mu$ V) and healthy controls (-2.46  
 294  $\mu$ V) was not different statistically. On the other hand, the amplitude of the PD rHuEPO group  
 295 (-0.67  $\mu$ V) was significantly lower than both of them. See Table 3 for details of amplitude and  
 296 latencies of N2 in Cz.

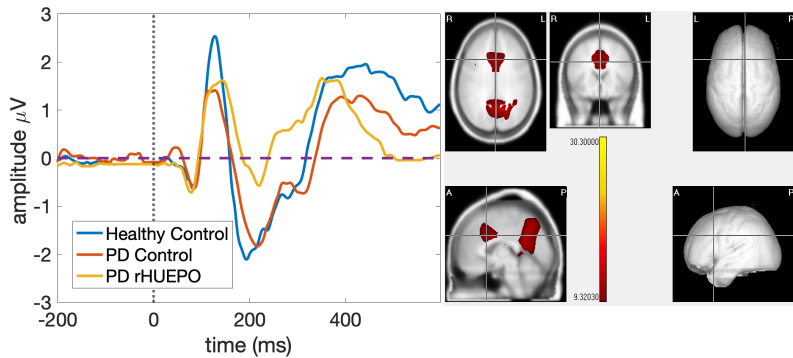

297  
 298 **Figure 3: Left: the N2 waveform averaged by groups in the window (200-300 msec.) in the electrode site Cz**  
 299 **with the highest amplitude. Note for the HC group the early 195 msec. latency and for both PD patients a later**  
 300 **peak around 224 msec. Right: The N2 component showed maximal activation at middle cingulum and**  
 301 **precuneus bilaterally (left located at X=92, Y=108, Z=156). To the right the localization of the precuneus left.**  
 302 **The bicolor scale is showing all the significant values after Bonferroni correction and using permutations.**

| Grupos     | Amplitude ( $\mu$ V) |               | Latency (msec.) |               |
|------------|----------------------|---------------|-----------------|---------------|
|            | Cz-<br>Cong          | Cz-<br>Incong | Cz-<br>Cong     | Cz-<br>Incong |
| HCs        | -2.4                 | -2.45         | 195             | 199           |
| PD Control | -2.10                | -2.09         | 226             | 224           |
| PD rHuEPO  | -0.56                | -0.67         | 224             | 223           |

303 **Table 3: The measures of amplitude and latency of the N2 component for the two conditions Congruent and**  
 304 **Incongruent at the electrode Cz which exhibited the highest amplitude.**

305 The source analysis of the differences (**comparing the three groups**), for the N2 component,  
 306 was localized anatomically by means of the LORETA randomized nonparametric test ( $p < 0.01$   
 307 level corrected for multiple comparisons) at the the middle cingulum and precuneus  
 308 bilaterally. See Figure 3, right side.

309 In order to know if the errors were related to the N2 amplitude, we select a linear mixed  
 310 effect model, and carried out a repeated measures ANOVA log(errors) x Group x amplitudeN2.  
 311 But the results were not significant for the interaction of log(errors) with the N2 amplitude,

312 only the main effect for Group ( $p=0.001675$ ). See Figure 4.

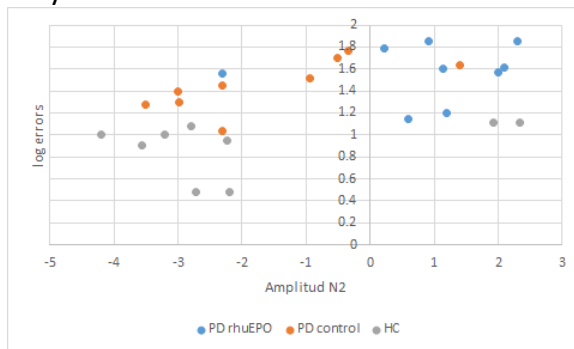

313

314 **Figure 4: the plot of the N2 and log(errors) of the three groups. Note the variability of the data with 2 outliers**  
315 **of the HCs and 1 outlier of the PD Control group with positive amplitudes of N2.**

## 316 Discussion

317 The current study was designed to examine if the novel rHuEPO neuroprotective compound,  
318 given to Parkinson patients in addition to their usual medication changed the amplitude of  
319 ERP components during an inhibitory control task.

320 The behavioural results were consisted with previous studies in PD patients in both the  
321 rHuEPO and PD Control groups. Both groups showed significantly increased reaction times  
322 and a higher number of errors to the incongruent stimuli during the performance of the  
323 flanker task as compared to age and education matched HCs. These higher error rates in PD  
324 controls are consistent with the proposal that the basal ganglia together with the anterior  
325 cingulate (Botvinick, Cohen, & Carter, 2004) participate in the monitoring of incongruence  
326 and error monitoring (Brázdil et al., 2002)(Michael Falkenstein, Christ, & Hohnsbein, 2000)  
327 which may be impaired in PD due to the dopamine deficiency (for a recent revision of how  
328 the progressive dopamine deficiency reduces striatal cholinergic interneuron activity see  
329 (McKinley et al., 2019).

330 It should be noted that we did not find the expected beneficial effect of rHuEPO on  
331 behavioural performance (RT and accuracy) in PD patients who received the  
332 neuroprotective agent as compared to those that only received the usual treatment. Rather,  
333 the differences between groups of patients were found in the ERP components. This is in  
334 accordance with our hypothesis that an overall behavioural response might be noisier than  
335 some of its time parsed substages. This suggests further studies to identify overt  
336 behavioural responses at similar short time scales as ERP components. On the other hand,  
337 as it sometimes happens with this type of clinical study the small sample size may lead to  
338 lack of power to detect subtle effects.

339 **Regarding the N1 component.** This component reflects selective attention, linked to the basic  
340 characteristics of a stimulus, and also to the recognition of a specific visual pattern (Luck,  
341 Woodman, & Vogel, 2000). N1 amplitude also has been hypothesized to reflect sustained  
342 covert visual attention (Di Russo, Martinez, & Hillyard, 2003) being associated with the  
343 intensity of covert attention to the central target in the flanker task. In terms of spatial  
344 localization, the N1 amplitude is greater in occipital regions (Luck et al., 2000; Mangun &  
345 Hillyard, 1990). The neural sources of the N1 in Flanker tasks were located at the brain visual  
346 areas of the occipital cortex (Herrmann & Knight, 2001; Hillyard & Anllo-Vento, 1998; Luck et

347 al., 2000). For example, Bokura (2001) using LORETA identified additional sources of the visual  
348 N1 in the occipito-temporal lobe (Bokura, Yamaguchi, & Kobayashi, 2001) and Zhang (2017)  
349 (Zhang, Brandt, Schrepf, Beste, & Stock, 2017) also localized N1 for Flanker source in extra-  
350 striate visual cortex. We thus expected the differences between PD groups to be localized on  
351 the scalp in the occipital electrodes and the sources to be in brain occipital areas.

352 This is what we found: the generators of N1, both in the scalp topography and using LORETA,  
353 in the visual areas of the occipital lobe of both hemispheres. The activation of the source for  
354 the PD patients who received rHuEPO was much larger that of the PD group who did not  
355 receive it. In fact, the response of the rHuEPO group became statistically indistinguishable  
356 from that of the HCs, suggestive of a possible neuroprotective effect of rHuEPO on the lingual  
357 gyrus, a region associated with the early and automatic processing of visual stimuli. In  
358 summary, our findings suggested an effect of rHuEPO on the visual attentional window in the  
359 early information-processing stage, thus enhancing the automatic processing of flankers  
360 regardless of their compatibility.

361 **Regarding the N2 component.** The second component N2 has been found in several studies  
362 of inhibition using the Flanker task and its amplitude and latency was unaltered in medicated  
363 PD patients (for a review see (Seer et al., 2016)). Van Veen and Carter (Veen & Carter, 2002)  
364 used BESA source localization to study inhibition and response conflict in the Eriksen Flanker  
365 Task, determining that the N2 amplitude associated with incongruent trials can be explained  
366 by a dipole that is located in the ACC. Bokura et al. (Bokura et al., 2001) also conducted an  
367 experiment to understand the anatomical structures that are involved in N2 using a visual  
368 modality of the Flanker paradigm and LORETA which located the N2 generators at cingulate  
369 and the right lateral orbitofrontal cortex.

370 In our study, we found that the amplitude of N2 component for the PD control and HC groups,  
371 were statistically indistinguishable. But the N2 amplitude in the rHuEPO PD group was  
372 diminished with respect to the other two groups. These effects were topographically located,  
373 as expected, in the fronto-central areas, with neural generators of these differences localised  
374 to the posteromedial portion of the parietal lobe, the precuneus, a structure involved in the  
375 processing of perceptual ambiguities of stimuli (Cavanna & Trimble, 2006) and in the middle  
376 cingulate cortex, probably related to monitoring of conflict in the Flanker task (Enriquez-  
377 Geppert et al., 2013). In comparison with previous reports, we concur with Van Eimeren who  
378 found dysfunction of the default mode network and particularly deactivation of the posterior  
379 cingulate cortex and the precuneus (van Eimeren, Monchi, Ballanger, & Strafella, 2009) in PD  
380 relative to healthy controls, considering these changes in PD closely related to higher errors  
381 in executive tasks in PD compared with healthy controls.

382 However, in our study the striking decrease of the N2 produced by rHuEPO needs further  
383 research to find an adequate explanation.

### 384 **Behaviour versus ERPs**

385 Contrary to our expectation, rHuEPO was not associated with a significant improvement in  
386 behavioural performance and did not influence the neural generators of the N2.

387 The ERP allows neural activity tracking on a millisecond time scale and represents a  
388 continuous measure of information processing, for that reason we selected the ERP to study  
389 a more refined measure of the process of inhibitory control.

390 This apparent contradiction between behavioural and electrophysiological results could be  
391 related to their different temporal course. Note that the inhibition is a complex process that  
392 can be automatically initiated in the first 100 msec. post-stimulus and extend its action  
393 through both automatic and controlled processes until 800 msec. Reaction time, on the other  
394 hand, started much later >400 milliseconds after the stimulus presentation, with a strong  
395 motor component to complete the response.

396 Therefore, the aim of our study is to use a flanker task to identify if rHuEPO improves  
397 automatic and controlled inhibitory control in PD patients and to locate the neural generators  
398 in these processes. This could be a first step in identifying an ERP biomarker for this type of  
399 cognitive process to be used in clinical trials.

#### 400 **Limitations**

401 Since this study was completed as part of a safety trial, the samples and the doses employed  
402 were small. This might also explain the lack of clear correlations with behaviour, for example  
403 reaction time with N2 amplitude. Thus, the results require confirmation with larger samples  
404 in future studies. However, the results highlighted the role of EEG source analysis and  
405 advantages of electrophysiology with its high temporal resolution and insensitivity to placebo  
406 effects, in identifying brain changes after an intervention such as rHuEPO.

#### 407 **Conclusions**

408 -We found that rHuEPO improved automatic inhibitory control in PD patients but did not  
409 improve behavioural performance.

410 -The differences between PD rHuEPO and PD Control groups was in the N1 component at the  
411 lingual gyrus. The differences between PD and healthy controls was on the N2 component in  
412 the cingulate and precuneus.

413 -Electrophysiology is potentially a useful tool for identifying effects of neuroprotective  
414 compounds on different stages of information processing.

415 -The components N1 and N2 as well as others like P3 should be further studied as possible  
416 biomarkers for the evaluation of neuroprotective drugs in Parkinson's Disease.

#### 417 **Data Availability**

418 The tables with the behavioural performance (reaction time, hits and errors) and the N2  
419 amplitude for the averaged time window (200-300 milliseconds) of the samples was  
420 submitted in the supplementary material 1. The raw and pre-processing EEG recordings in  
421 BrainVision format with all the individual and grand average potentials for group and  
422 condition can be available by request to [maria.bringas@neuroinformatics-collaboratory.org](mailto:maria.bringas@neuroinformatics-collaboratory.org)

#### 423 **Conflicts of Interest**

424 The authors declare that there is no conflict of interest regarding the publication of this  
425 paper.

## 426 **Funding Statement**

427 This paper received support from the NSFC (China-Cuba-Canada) project (No. 81861128001) and the  
428 funds from National Nature and Science Foundation of China (NSFC) with funding No. 61871105,  
429 61673090, and 81330032, and CNS Program of UESTC (No. Y0301902610100201).

## 430 **Acknowledgments**

431 The authors would like to thank to the Centro de Neurociencias de Cuba, specially to Valia Rodriguez  
432 and Indira Alvarez for the support during the recordings of the ERPs and the Centro Internacional de  
433 Restauracion Neurologica for the recruitment and neuropsychological evaluation of the patients. We  
434 are in debt with all the PD patients and their caretakers who volunteer to participated in our study.

## 435 **Supplementary Materials**

436 The supplementary material 1 consisted in one excel table with the behavioural  
437 performance of the subjects during the Flanker task. Tab “Answers”: the hits, errors and  
438 non-answers in the congruent and incongruent condition. Tab “Reaction Time”: the mean  
439 and standard deviation (SD) of the hits, errors of each subject in each group for congruent  
440 and incongruent trials.

## 441 **References**

- 442 Athauda, D., & Foltynie, T. (2015). The ongoing pursuit of neuroprotective therapies in  
443 Parkinson disease. *Nature Reviews Neurology*, *11*(1), 25–40.  
444 <https://doi.org/10.1038/nrneuro.2014.226>
- 445 Bokura, H., Yamaguchi, S., & Kobayashi, S. (2001). Electrophysiological correlates for  
446 response inhibition in a Go/NoGo task. *Clinical Neurophysiology*, *112*(12), 2224–2232.
- 447 Botvinick, M. M., Cohen, J. D., & Carter, C. S. (2004). Conflict monitoring and anterior  
448 cingulate cortex : an update. *Trends in Cognitive Sciences*, *8*(12), 8–12.  
449 <https://doi.org/10.1016/j.tics.2004.10.003>
- 450 Brázdil, M., Roman, R., Falkenstein, M., Daniel, P., Jurák, P., & Rektor, I. (2002). Error  
451 processing – evidence from intracerebral ERP recordings. *Experimental Brain Research*,  
452 *146*(4), 460–466. <https://doi.org/10.1007/s00221-002-1201-y>
- 453 Brines, M., & Cerami, A. (2005). Emerging biological roles for erythropoietin in the nervous  
454 system. *Nature Reviews Neuroscience*, *6*(6), 484–494. <https://doi.org/10.1038/nrn1687>
- 455 Cavanna, A. E., & Trimble, M. R. (2006). The precuneus: a review of its functional anatomy  
456 and behavioural correlates. *Brain*, *129*(3), 564–583.  
457 <https://doi.org/10.1093/brain/awl004>
- 458 Di Russo, F., Martinez, A., & Hillyard, S. A. (2003). Source analysis of event-related cortical  
459 activity during visuo-spatial attention. *Cerebral Cortex*, *13*(5), 486–499.  
460 <https://doi.org/10.1093/cercor/13.5.486>
- 461 Enriquez-Geppert, S., Eichele, T., Specht, K., Kugel, H., Pantev, C., & Huster, R. J. (2013).  
462 Functional parcellation of the inferior frontal and midcingulate cortices in a flanker-

- 463 stop-change paradigm. *Human Brain Mapping*, 34(7), 1501–1514.
- 464 Eriksen, B. A., & Eriksen, C. W. (1974). Effects of noise letters upon the identification of a  
465 target letter in a nonsearch task. *Perception & Psychophysics*, 16(1), 143–149.  
466 <https://doi.org/10.3758/BF03203267>
- 467 Falkenstein, M, Willemsen, R., Hohnsbein, J., & Hielscher, H. (2006). Effects of stimulus–  
468 response compatibility in Parkinson’s disease. A psychophysiological analysis. *Journal of*  
469 *Neural Transmission*, 113, 1449–1462.
- 470 Falkenstein, Michael, Christ, S., & Hohnsbein, J. (2000). ERP components on reaction errors  
471 and their functional significance : a tutorial. *Biological Psychology*, 51, 87–107.
- 472 Folstein, J. R., & Van Petten, C. (2008). Influence of cognitive control and mismatch on the  
473 N2 component of the ERP: a review. *Psychophysiology*, 45, 152–170.
- 474 Folstein, M. F., Folstein, S. E., & McHugh, P. R. (1975). “Mini-mental state”: a practical  
475 method for grading the cognitive state of patients for the clinician. *Journal of*  
476 *Psychiatric Research*, 12(3), 189–198.
- 477 Galán, L., Biscay, R., Rodríguez, J. L., Pérez-Abalo, M. C., & Rodriguez, R. (1997). Testing  
478 topographic differences between event related brain potentials by using non-  
479 parametric combinations of permutation tests. *Electroencephalography and Clinical*  
480 *Neurophysiology*, 102(3), 240–247.
- 481 Galan, L., Biscay, R., Valdes, P., Neira, L., & Virues, T. (1994). Multivariate statistical brain  
482 electromagnetic mapping. *Brain Topography*, 7(1), 17–28.  
483 <https://doi.org/10.1007/BF01184834>
- 484 Hamilton, M. A. (1960). A Rating Scale for Depression. *J Neurol Neurosurg Psychiatry*, 23,  
485 56–62.
- 486 Herrmann, C. S., & Knight, R. T. (2001). Mechanisms of human attention: event-related  
487 potentials and oscillations. *Neuroscience & Biobehavioral Reviews*, 25(6), 465–476.
- 488 Hillyard, S. A., & Anllo-Vento, L. (1998). Event-related brain potentials in the study of visual  
489 selective attention. *Proceedings of the National Academy of Sciences*, 95(3), 781–787.
- 490 Hughes, A. J., Daniel, S. E., Kilford, L., & Lees, A. J. (1992). Accuracy of clinical diagnosis of  
491 idiopathic Parkinson’s disease: a clinico-pathological study of 100 cases. *Journal of*  
492 *Neurology, Neurosurgery & Psychiatry*, 55(3), 181–184.
- 493 Jasper, H. H. (1958). Report of the committee on methods of clinical examination in  
494 electroencephalography. *Electroencephalography and Clinical Neurophysiology*, 10(2),  
495 370–375. [https://doi.org/10.1016/0013-4694\(58\)90053-1](https://doi.org/10.1016/0013-4694(58)90053-1)
- 496 Kehagia, A. A., Barker, R. A., & Robbins, T. W. (2010). Neuropsychological and clinical  
497 heterogeneity of cognitive impairment and dementia in patients with Parkinson’s  
498 disease. *The Lancet Neurology*, 9(12), 1200–1213.
- 499 Luck, S. J., Woodman, G. F., & Vogel, E. K. (2000). Event-related potential studies of  
500 attention. *Trends in Cognitive Sciences*, 4(11), 432–440.
- 501 Mangun, G. R., & Hillyard, S. A. (1990). Allocation of visual attention to spatial locations:  
502 tradeoff functions for event-related brain potentials and detection performance.  
503 *Perception & Psychophysics*, 47(6), 532–550.

- 504 McKinley, J. W., Shi, Z., Kawikova, I., Hur, M., Bamford, I. J., Sudarsana Devi, S. P., ...  
505 Bamford, N. S. (2019). Dopamine Deficiency Reduces Striatal Cholinergic Interneuron  
506 Function in Models of Parkinson's Disease. *Neuron*, *103*(6), 1056-1072.e6.  
507 <https://doi.org/10.1016/j.neuron.2019.06.013>
- 508 Nichols, T., & Holmes, A. P. (2001). Nonparametric permutation tests for functional  
509 neuroimaging: A primer with examples. *Hum. Brain Mapp.*, *15*, 1–25.
- 510 Obeso, I., Wilkinson, L., Casabona, E., Bringas, M. L., Alvarez, M., Alvarez, L., ... Jahanshahi,  
511 M. (2011). Deficits in inhibitory control and conflict resolution on cognitive and motor  
512 tasks in Parkinson's disease. *Exp Brain Research*, *212*, 371–384.  
513 <https://doi.org/10.1007/s00221-011-2736-6>
- 514 Pascual-Marqui, R. D., Lehmann, D., Koenig, T., Kochi, K., Merlo, M. C. G., Hell, D., &  
515 Koukkou, M. (1999). Low resolution brain electromagnetic tomography (LORETA)  
516 functional imaging in acute, neuroleptic-naive, first-episode, productive schizophrenia.  
517 *Psychiatry Research: Neuroimaging*, *90*(3), 169–179.
- 518 Pedroso, I., Bringas, M. L., Aguiar, A., Morales, L., Alvarez, M., Alvarez, L., & Valdes-Sosa, P.  
519 A. (2012). Use of Cuban Recombinant Human Erythropoietin in Parkinson's Disease  
520 Treatment. *MEDICC Review*, *14*(1), 11–17.
- 521 Picton, T. W., Bentin, S., Berg, P., Donchin, E., Hillyard, S. A., Johnson, R., ... Taylor, M. J.  
522 (2000). Guidelines for using human event-related potentials to study cognition :  
523 Recording standards and publication criteria. *Psychophysiology*, *37*, 127–152.
- 524 Pires, L., Leitai, J., Guerrini, C., & Simoes, M. R. (2014). Event-related brain potentials in the  
525 study of inhibition: Cognitive control, source localization and age-related modulations.  
526 *Neuropsychological Review*, *24*, 461–490. <https://doi.org/10.5956/jriet.33.327>
- 527 Praamstra, P., Stegeman, D. F., Cools, A. R., & Horstink, M. W. (1998). Reliance on external  
528 cues for movement initiation in Parkinson's disease. Evidence from movement-related  
529 potentials. *Brain: A Journal of Neurology*, *121*(1), 167–177.
- 530 Praamstra, Peter, Plat, E. M., Meyer, A. S., & Horstink, M. W. I. M. (1999). Motor cortex  
531 activation in Parkinson's disease: Dissociation of electrocortical and peripheral  
532 measures of response generation. *Movement Disorders: Official Journal of the*  
533 *Movement Disorder Society*, *14*(5), 790–799.
- 534 Schrag, A., Jahanshahi, M., & Quinn, N. (2000). What contributes to quality of life in patients  
535 with Parkinson's disease? *Journal of Neurology, Neurosurgery & Psychiatry*, *69*(3), 308–  
536 312.
- 537 Seer, C., Lange, F., Georgiev, D., Jahanshahi, M., & Kopp, B. (2016). Event-related potentials  
538 and cognition in Parkinson's disease : An integrative review. *Neuroscience &*  
539 *Biobehavioral Reviews*, *69*, 691–714.
- 540 Seer, C., Lange, F., Loens, S., Wegner, F., Schrader, C., Dressler, D., ... Kopp, B. (2017).  
541 Dopaminergic modulation of performance monitoring in Parkinson's disease: An event-  
542 related potential study. *Scientific Reports*, *7*(December 2016), 1–13.  
543 <https://doi.org/10.1038/srep41222>
- 544 Sirén, A., Faßhauer, T., Bartels, C., & Ehrenreich, H. (2009). Therapeutic Potential of  
545 Erythropoietin and its Structural or Functional Variants in the Nervous System.

- 546 *Neurotherapeutics*, 6(January), 108–127.
- 547 Tzourio-Mazoyer, N., Landeau, B., Papathanassiou, D., Crivello, F., Etard, O., Delcroix, N., ...  
548 Joliot, M. (2002). Automated anatomical labeling of activations in SPM using a  
549 macroscopic anatomical parcellation of the MNI MRI single-subject brain. *Neuroimage*,  
550 15(1), 273–289.
- 551 van Eimeren, T., Monchi, O., Ballanger, B., & Strafella, A. P. (2009). Dysfunction of the  
552 default mode network in Parkinson disease: a functional magnetic resonance imaging  
553 study. *Archives of Neurology*, 66(7), 877–883.
- 554 Veen, V. van, & Carter, C. S. (2002). The timing of action-monitoring processes in the  
555 anterior cingulate cortex. *Journal of Cognitive Neuroscience*, 14(4), 593–602.
- 556 Verleger, R., Hagenah, J., Weiss, M., Ewers, T., Heberlein, I., Pramstaller, P. P., ... Klein, C.  
557 (2010). Responsiveness to distracting stimuli, though increased in Parkinson's disease,  
558 is decreased in asymptomatic PINK1 and Parkin mutation carriers. *Neuropsychologia*,  
559 48(2), 467–476. <https://doi.org/10.1016/j.neuropsychologia.2009.10.004>
- 560 Wylie, S A, Wildenberg, W. P. M. Van Den, Ridderinkhof, K. R., Bashore, T. R., Powell, V. D.,  
561 Manning, C. A., & Wooten, G. F. (2009). The effect of Parkinson ' s disease on  
562 interference control during action selection. *Neuropsychologia*, 47, 145–157.  
563 <https://doi.org/10.1016/j.neuropsychologia.2008.08.001>
- 564 Wylie, Scott A, Stout, J. C., & Bashore, T. R. (2005). Activation of conflicting responses in  
565 Parkinson's disease: evidence for degrading and facilitating effects on response time.  
566 *Neuropsychologia*, 43(7), 1033–1043.  
567 <https://doi.org/10.1016/j.neuropsychologia.2004.10.008>
- 568 Xue, Y., Zhao, L., & Guo, W. (2007). Intrastriatal administration of erythropoietin protects  
569 dopaminergic neurons and improves neurobehavioral outcome in a rat model of  
570 Parkinson's disease. *Neuroscience*, 146, 1245–1258.  
571 <https://doi.org/10.1016/j.neuroscience.2007.02.004>
- 572 Zhang, R., Brandt, M. D., Schrepf, W., Beste, C., & Stock, A.-K. (2017). Neurophysiological  
573 mechanisms of circadian cognitive control in RLS patients-an EEG source localization  
574 study. *NeuroImage: Clinical*, 15, 644–652.
- 575
